# Supplementary material for: Horizontal transfer of a ß-1,6-glucanase gene from an ancestral species of fungal endophyte to a cool-season grass host
Source: PubMed Central journal article supplement (PMC5567365; doi:10.1038/s41598-017-07886-2), 2017-08-22
Supplement: 41598_2017_7886_MOESM1_ESM.pdf [file 41598_2017_7886_MOESM1_ESM.pdf]

# Horizontal transfer of a $\beta$ -1,6-glucanase gene from an ancestral species of fungal endophyte to a cool-season grass host

Hiroshi Shinozuka<sup>1,2,\*</sup>, Inoka K Hettiarachchige<sup>1,2</sup>, Maiko Shinozuka<sup>1,2</sup>, Noel O.I. Cogan<sup>1,2,3</sup>, German C. Spangenberg<sup>1,2,3</sup>, Benjamin G. Cocks<sup>1,2,3</sup>, John W. Forster<sup>1,2,3</sup>, Timothy I. Sawbridge<sup>1,2,3</sup>

<sup>1</sup>Agriculture Victoria, AgriBio, Centre for AgriBioscience, 5 Ring Road, La Trobe University, Bundoora, Victoria 3083, Australia

<sup>2</sup>Dairy Futures Cooperative Research Centre, Australia

<sup>3</sup>School of Applied Systems Biology, La Trobe University, Bundoora, Victoria 3086, Australia

\*Corresponding author: e-mail – [hiroshi.shinozuka@ecodev.vic.gov.au](mailto:hiroshi.shinozuka@ecodev.vic.gov.au)

## Supplementary Information Legends

### Supplementary Fig. S1

DNA sequence alignment of the two haplotypes from the C3 genotype. Dash (-) in the DNA sequence shows a gap, and asterisk (\*) under the alignment denotes 'conserved nucleotide'. DNA sequence corresponding to the PCR primers for the indel-based genotyping assay is underlined.

### Supplementary Fig. S2

Result of the indel-based genotyping assay. The PCR amplicons were visualised on an agarose gel including the SYBR™ Safe DNA Gel stain (Thermo Fisher Scientific, Waltham, Massachusetts, USA). EasyLadder I (BIOLINE) was used as a size standard, and the 250 and 500 bp fragments are indicated with red arrows. The genotype UI of the genetic mapping population is indicated in each lane. C3 and NTC stand for 'the C3 genotype' and 'no-template control'.

### Supplementary Fig. S3

PCR screening for the *LpBGNL* sequence using the *LpBGNL* locus-specific primers (*LpBGNL\_short*). (a) PCR amplicons from perennial ryegrass genotypes *Impact<sub>04</sub>* and C3, and perennial ryegrass-associated endophyte were visualised on the 2200 TapeStation instrument using the High Sensitivity D1000 Kit (Agilent). The purple and green lines show the position of upper and lower markers, respectively, of the High Sensitivity D1000 Kit. (b) PCR amplicons from *Lolium* and *Festuca* species (sub-tribe Loliinae) were visualised on an agarose gel containing the SYBR™ Safe stain. Tall fescue genotypes from two cultivars (Demeter and Quantum) were subjected to the screening. NTC denotes 'no-template control' for the PCR assay. (c) PCR amplicons from cocksfoot, *Dactylis marina*, coast tussock-grass and harding grass were visualised on the 2200 TapeStation instrument using the D1000 Kit. The purple and green lines show the position of upper and lower markers, respectively, of the D1000 Kit. Two genotypes of coast tussock-grass were subjected, and the *Impact<sub>04</sub>* genotype was used as a positive control.

### Supplementary Fig. S4

DNA sequences of the conserved ca. 750-bp region from plant species. Putative premature stop codons were found in *Dactylis marina* haplotypes 2 and 3.

### Supplementary Fig. S5

PCR assay for confirmation of a cross-species amplification capacity. PCR amplicons from cocksfoot, *Dactylis marina*, coast tussock-grass and harding grass were visualised on the 2200 TapeStation instrument using the D1000 Kit. The purple and green lines show the position of upper and lower markers, respectively, of the D1000 Kit. The position of the target amplicons is indicated with a red arrow. The *Impact<sub>04</sub>* genotype was used as a positive control, and NTC denotes 'no-template control' for the PCR assay.

## Supplementary Information Legends (Cont'd)

### Supplementary Table S1

DNA sequence identity between *Lp*BGNL and fungi  $\beta$ -1,6-glucanase genes. 'NCBI UI' denotes the unique identifier of the NCBI database.

### Supplementary Table S2

Result of the read count-based gene expression analysis from tissue-specific sequencing libraries. The number of reads obtained through filtering is shown as 'total reads', and 'counts' denote the number of reads corresponding to *Lp*BGNL.

### Supplementary Table S3

Result of the read count-based gene expression analysis from E- and E+ seedling-derived sequencing libraries. The number of reads obtained through filtering is shown as 'total reads', and 'counts' refer to the number of reads corresponding to the *Lp*BGNL or *Epichloë*  $\beta$ -1,6-glucanase gene.

### Supplementary Table S4

Details of the short-read sequencing dataset used in the current study.

### Supplementary Table S5

PCR primers used in the current study.

### Supplementary Note S1

Figure legend for Fig. 4 generated with the MEGA7 program.

# Supplementary Fig. S1

```
C3-hap1      AGGGCATCAACAAGATCAGGGGCGTTAATTTTCGGCGGTATGTCTTCTTTACAGCTGCTAC
C3-hap2      AGGGCATCAACAAGATCAGGGGCGTTAATTTTCGGCGGTATGTCTTCTTTACAGCTGCTAC
*****

C3-hap1      TTCCTCCATCCTCCGATAATACAAGTCACATTCTTTTTGCAAATTATATGGATCCAGAA
C3-hap2      TTCCTCCGTCGTCCATAATATAAGTCACATTCTTTTTCCAAAATTATATGTATCCAGAA
***** ** *** ***** ***** ***** ***** *****

C3-hap1      -GTATAAATGGTTGCATTCC-TCTTACAGATCTCTTTCATTTTCATATATGTTTATTGATCAGA
C3-hap2      CGTATAAATGTTTGCATTCTGTCTTGCAAATCTCTTTCATTTTCATATATATTTATACAGA
***** ***** ***** ** ***** ***** ***** ** ** *****

C3-hap1      TTTTGTGGA-----GTACT-----
C3-hap2      TTTCGTGGATATATATTATAAGTGTAACATCATGGTAAATACTGTAAATTGTTGACCAGCA
*** *****                      *****

C3-hap1      -----AACTAACAGAGGTTGAAATTCTCAGGCTGGCTCATCTGTGAGCCATGGATGATGA
C3-hap2      GCTAAATTTAACATGGGTTGAAATTCTCAGGCTGGCTCATCTGTGAGCCATGGATGATGA
* ***** *****

C3-hap1      GCGACG
C3-hap2      GCGACG
*****
```

# Supplementary Fig. S2

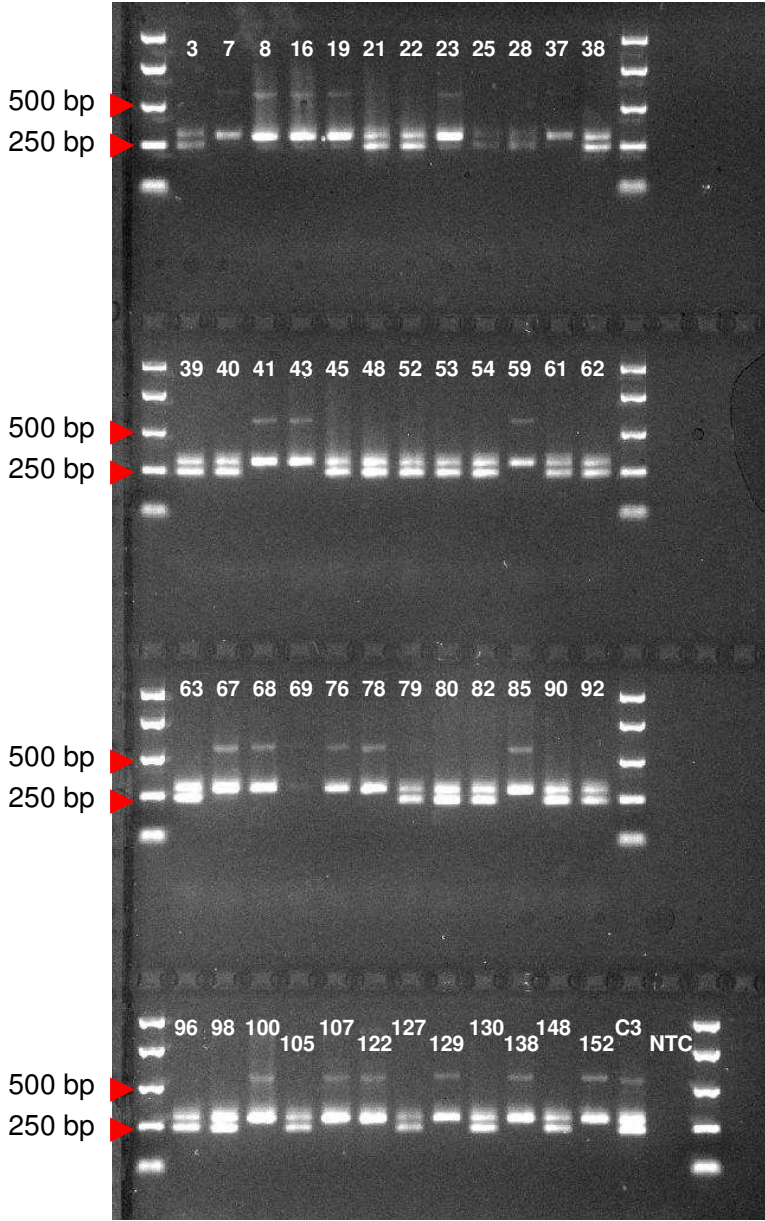

# Supplementary Fig. S3

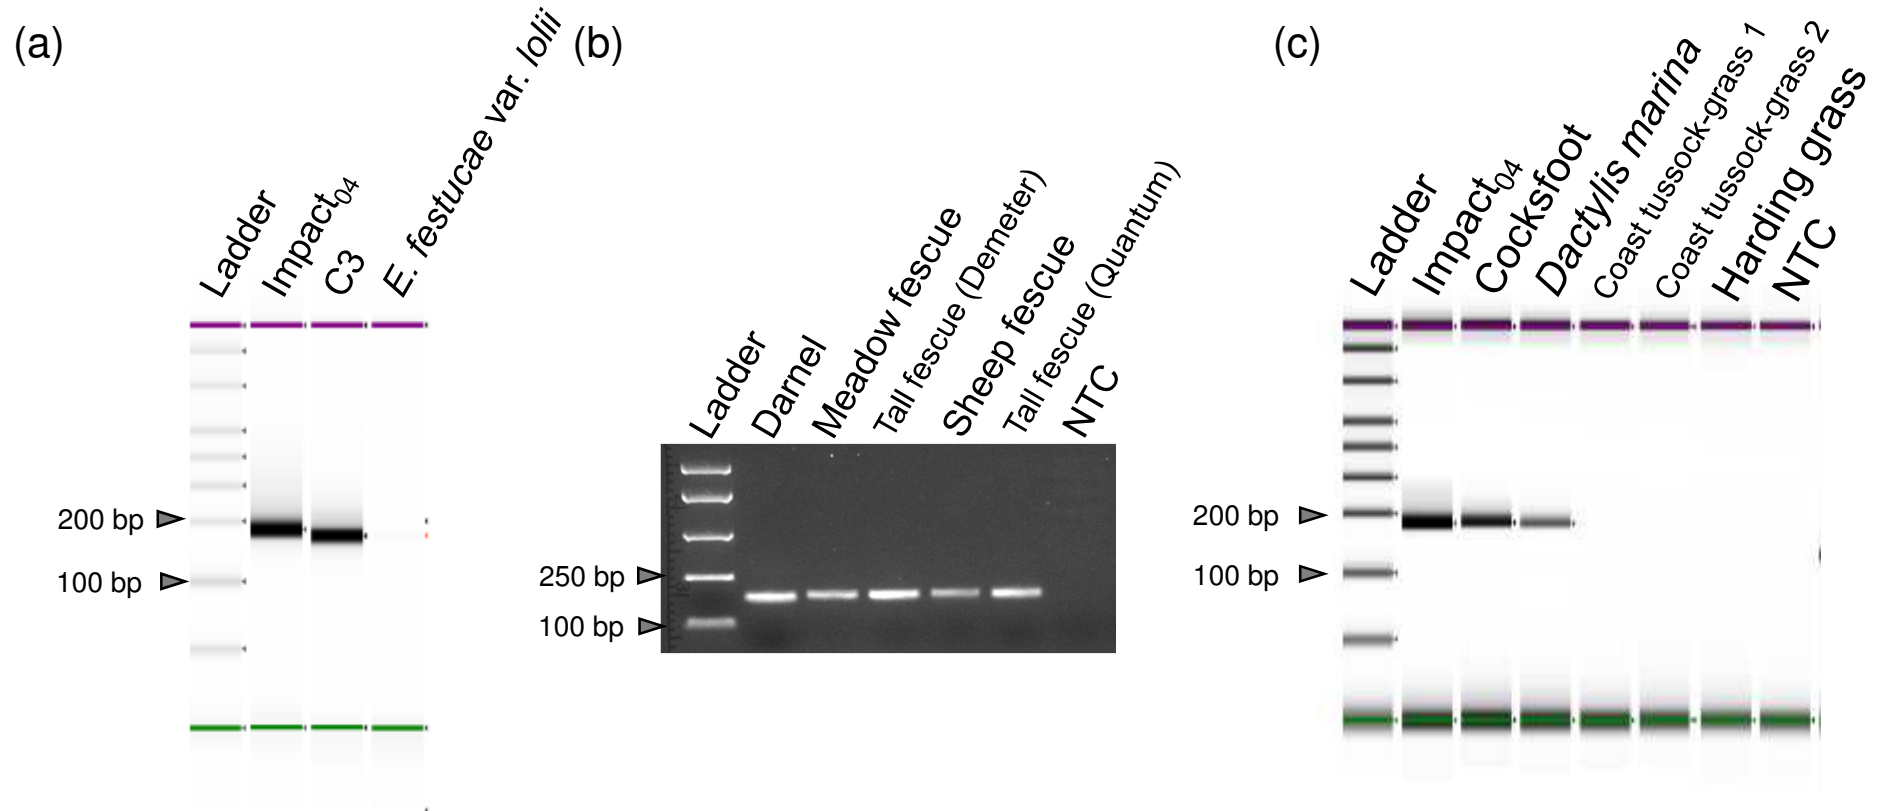

# Supplementary Fig. S4

>Perennial ryegrass

ATGATGAGCGACGAGTGGAAACAACGTCATGGGCTGCAACGGGGCTGCCTCCGAGTTCGACTGCATGCTAAACAATTACATGGGAAGCAATCGAGCTGCCGGCAACGACAAGTTCGAGACTCATTGGAGGACTT  
GGATCAATGCCGACAGCGTCGAGTCAGTCCACTATGTTGGCCTGAACACGATTTCGCATCCCCATCGGGTACTGGTCTACGTGGACATTGTGACAAGGCCAGTGAGCCCTTTGCCGATGGCAACAGGATGCT  
CCCATACCTGGACGCCGTCGTCCAAAAGGCTGCTGACCTTGGCATGTATGTCATCATCGATCTTCATGGGGCTCCCGGGCGGGCAGCAACAAGACGCCTTACCGGCCAGAACAACAAGCCGGCCGGTTTCTTC  
AACGACTACAACTTTGACCCGCGCAACAGGTGGATGTCGTGGATGACGAGGCGCATCCACACAACCCTGCCTATGCCACCGTCCGGCATGATTGAGGTTCTCAACGAGCCCGTGTCCGGACACGACTCGGAC  
GGACGGTACCCTGCCCGGTCAGGTCCCGGGCTGGTCCAGAAGTACTACCCGGGCGCTCTCAAGGCGGTCCGAGATGTGGAAGCGTCTCTCGGAGTGGCTGACGGCAACAAGCTCCATGTGCAGTTCAT  
GTCCAGAAAGTGGGACTCGGGCAACGCGCGGACAACCTGCCCCTGGCCAACGACCAACGCACTGCGTTTCGATGACCACAACACTACATT

>Meadow fescue

ATGATGAGCGACGAGTGGAAACAACGTCATGGGCTGCAACGGGGCTGCCTCCGAGTTCGACTGCATGCTAAACAATTACATGGGAAGCAATCGAGCTGCCGGCAACGACAAGTTCGAGACTCACTGGAGGACT  
TGGATCAATGCCGACAGCGTCGAGTCAGTCCACTATGTTGGCCTGAACACGATTTCGCATCCCCATCGGGTACTGGTCTACGTGGACATTGTGACAAGGCCAGTGAGCCCTTTGCCGACGGCAACAGGATGC  
TCGCATACCTGGATGCCGTTGTCCAAAAGGCTGCTGACCTTGGCATCTATGTCATCATCGATCTGCATGGGGCTCCCGGGCGGGCAGCAACAAGACGCCTTTACCGGCCAGAACAACAAGCCGGCCGGTTTCTTC  
CAACGACTACAATTTTGACCCGCGCAACAGGTGGATATCGTGGATGACGAGGCGCATCCACACAACCCTGCCTACGCCACCGTCCGGCATGATTGAGGTTCTCAACGAACCCGTCTCCGGACACGACCCGGCC  
GGACGGTACCCTGCCCGGTCAGGTCCCGGGCTGGTCCAGAAGTACTACCCGGGCGCTCTCAAGGCGGTCCGAGATGCCGAAGCGTCTCTCGGCGTTGCTGACGGCAACAAGCTCCACGTGCAGTTCAT  
GTCCAGAAATGGGACTCGGGCAACGCGCGGACAACCTGCCCCTGGCCAACGACCAACGCACTGCGTTTCGATGACCACAACACTACATT

>Tall fescue

ATGATGAGCGACGAGTGGAAACAAGGTCATGGGCTGCAACGGGGCTGCCTCCGAGTTCGACTGCATGCTAAACAATTACATGGGAAGCAATCGAGCTGCCGGCAACGACAAGTTCGAGACTCACTGGAGGACT  
TGGATCAATGCCGACAGCGTCGAGTCAGTCCACTATGTTGGCCTGAACACGATTTCGCATCCCCATCGGGTACTGGTCTACGTGGACATTGTGGACAAGGCCAGTGAGCCCTTTGCCGACGGCAACAGGATGC  
TCCCATACCTGGATGCCGTTGTCCAAAAGGCCGCTGACCTTGGCATCTATGTCATCATCGATCTGCATGGGGCTCCCGGGCGGGCAGCAACAAGACGCCTTTACCGGCCAGAACAACAAGCCGGCCGGTTTCTA  
CAACGACTACAATTTTGACCCGCGCAACAGGTGGATATCGTGGATGACGAGGCGCATCCACACAACCCTGCCTACGCCACCGTCCGGCATGATTGAGGTTCTCAACGAACCCGTCTCCGGGACGACCCGGAC  
GGACGGTACCCTGCCCGGTCAGGTCCCGGGCTGGTCCAGAAGTACTACCCGGGCGCTCTCAAGGCGGTCCGAGATGCCGAAGCGTCTCTCGGCGTTGCTGACGGCAACAAGCTGCACGTGCAGTTCAT  
GTCCAGAAATGGGACTCGGGCAACGCGCGGACAACCTGCCCCTGGCCAACGACCAACGCACTGCGTTTCGATGACCACAACACTACATT

>Darnel

ATGATGAGCGACGAGTGGAAACAACGTCATGGGCTGCAACGGAGCTGCCTCCGAGTTCGACTGCATGCTAAACAATTACATGGGAAGCAATCGAGCTGCCGGCAACGACAAGTTCGAGACTCATTGGAGGACTT  
GGATCAATGCCGACAGCGTCGAGTCAGTCCACTATGTTGGCCTGAACACGATTTCGCATCCCCATCGGGTACTGGTCTACGTGGACATTGTGACAAGGCCAGCGAGCCCTTTGCCGACGGCAACAGGATGC  
TCCCATACCTGGACGCCGTCGTCCAAAAGGCTGCTGACCTCGGCATCTATGTCATCATCGATCTTCATGGGGCTCCCGGTGGGCAGCAACAGGACGCCTTTACCGGCCAGAACAACAAGCCGGCCGGTTTCTTC  
CAACGACTACAACTTTGACCCGCGCAACAGGTGGATGTCGTGGATGACGAGGCGCATCCACACAACCCTGCCTATGCCACCGTCCGGCATGATTGAGGTTCTCAACGAGCCCGTGTCCGGACACGACTCGGA  
CGGACGGTACCCTGCCCGGTCAGGTCCCGGGCTGGTCCAGAAGTACTACCCGGGCGCTCTCAAGGCGGTCCGAGATGTGGAAGCGTCTCTCGGAGTGGCTGACGGCAACAAGCTCCATGTGCAATTCA  
TGTCCAGAAAGTGGGACTCGGGCAACGCGCGGACAACCTGCCCCTGGCCAACGACCAACGCACTGCATTTCGATGACCACAACACTACATT

>Sheep fescue

ATGATGAGTACGAGTGGAAACAACGTCATGGGCTGCAACGGGGCTGCCTCCGAGTTCGACTGCATGCTGAACAATTACATGGGAACCAACGAGCCCAAGGCAACGACAATTCGAGACTCACTGGAGGACTT  
GGATCAACGCCGACAGCGTCAGTCCAGCCCAGACGTCGGCCTCAACACGATACGCATTCCCATCGGGTACTGGTCTACGTAGACATCGTGCACAAGGCCAGCGAGCCCTTTGCTGATGGCAACAGGATGC  
TCCCCTACCTGGACGCCGTCGTCCAGAAGGCCGCCGACCTTGGCATGTACGTCAATCATCGACTGCACGGGGCACCCGGCGGCCAGCAGGAAGACCCCTTTACCGGCCAGAACAACAAGCCGGCCGGTTTCTTC  
TTCGACGACTACAACTTTGCCCGTGCCTAAAAGTGGATGTCGTGGATGACGAGGCGCATCCACACAACCCTGCCTACGCCACCGTCCGGCATGATTGAAGTACTGAACGAGCCCGTCTCCGGGATGATGGG  
GGCGGACGGTACCCTGCACCTGGTCAAGTCCCGGGCTGGTCCAGAAGTACTACCCAGGCGCTCTGAAGGCGGTTCGAGACGCTGAAGCGTCCGCTCGGCGTGGCTGACGACAACAAGCTCCACGTGCAATT  
CATGTCCAAAATGGGACTCCGGCAACCCACGCGACAGCTCAGCCGTGGCCAACGACAAGTTCACCTGCGTTTCGATGACCACAACACTACATT

# Supplementary Fig. S4 (Cont'd)

>Cocksfoot (haplotype 1)

ATGATGAGTGACGAGTGGAAACAACGTCATGGGTTGCAGCGGGGCTGCCTCCGAGTTCGACTGCATGCTCAACAATTACGGCGGAAGTAAACGAGACGCCGGCAACGAGAAGTTCGAGACTCACTGGAGGACT  
TGGATCAACGCCGACAGCGTCCAGTCAGCCACGACGTTGGCCTGAACACCATTTCGATTCCCATGGGGTACTGGTCCAACGTAGACATCGTCGACAAGGCCAGCGAGCCCTTCGCCGACGGCGACAAGATG  
CTCCCCCTACCTCGACGCCGTCGTCCAGAAGGCCGCTGACCTGGCATGTATGTCATCATCGATCTGCACGGGGCACCCGGAGGCCAGCAGGAGGACGCTTTCACCGGCCAGAATAACAAGCCGGCCGGCTT  
CTTCAACGACTACAACCTTCGGCCGTGCCAGGCATGGATGTCGTGGATGACGAAGCGCATCCACACGAACCCTGCCTACGCCGCCGCTGTCGGCATGATCGAAGTCTCAACGAGCCAGTCTCCATGCACGAC  
AAGGACAATCGGTATCCTGCCCTGGTGAAGTACCCGGACTGGTCCAAAAGTACTACCCGGCGCTCTCAAGGCAGTCCGAGATGCCGAAGCGTCGCTCGGCCGTGGCCGAAGGCAACAAGCTCCACGTGCA  
ATTCATGTCCCAGAAGTGGGAATCGGGCAACCCGCGGGACAACCTCTGCCGTGGCCAACGACAAGCTCAGTGCCTTCGATGACCATAACTACATT

>Cocksfoot (haplotype 2)

ATGATGAGTGACGAGTGGGACAACGTCATGGGTTGCAGCGGGGCTGCCTCCGAGTTCGACTGCATGCTCAACAATTACGGCGGAAGTAAACGAGACGCCGGCAACGAGAAGTTCGAGACTCACTGGAGGACT  
TGGATCAACGCCGACAGCGTCCAGTCAGCCACGACGTTGGCCTGAACACCATTTCGATTCCCATGGGGTACTGGTCCAACGTAGACATCGTCGACAAGGCCAGCGAGCCCTTCGCCGACGGCGACAGGATG  
CTCCCCCTACCTCGACGCCGTCGTCCAGAAGGCCGCTGACCTGGCATGTATGTCATCATCGATCTGCACGGGGCACCCGGAGGCCAGCAGGAGGACGCTTTCACCGGCCAGAATAACAAGCCGGCCGGCTT  
TTCAACGACTACTACTTCGGCCGTGCACAGGCGTGGATGTCGTGGATGACGAAGCGCATCCACACGAACCCTGCCTACGCCGCCGCTGTCGGCATGATCGAGGTCCTCAACGAGCCCGTCTCCGGGCACGAC  
AAGGACCATCGGTATCCTGCCCTGGTGAAGTACCCGGACTGGTCCAAAAGTACTACCCGGCGCTCTCAAGGCAGTCCGAGATGCCGAAGCGTCGCTCGGCCGTGGCCGAAGGCAACAAGCTCCACGTGCA  
ATTCATGTCCCAGAAGTGGGGCTCGGGCAACCCGCGGGACAACCTCTGCCGTGGCCAACGACAAGCTCATTGCGTTCGATGACCACAACACTACATT

>Cocksfoot (haplotype 3)

ATGATGAGTGACGAGTGGGACAACGTCATGGGTTGCAGCGGGGCTGCCTCCGAGTTCGACTGCATGCTCAACAATTACGGCGGAAGTAAACGAGACGCCGGCAATGAGAAGTTCGAGACTCACTGGAGGACT  
TGGATCAACGCCGATAGCGTCCAGTCAGCCACGACGTTGGCCTGAATACCATTTCGATTCCCATGGGGTACTGGTCCAACGTAGACATCGTCGACAAGGCCAGCGAGCCCTTCGCCGACGGCGACAGGATG  
CTCCCCCTACCTGGACGCCGTCGTCCAGAAGGCCGCTGACCTGGCATGTATGTCATCATCGATCTGCACGGGGCACCCGAAGGCCAGCAGGAGGACGCTTTCACCGGCCAGAACAACAAGCCGGCCGGCTT  
CTTCAACGACTACAACCTTCGGCCGTGCCAGGCATGGATGTCGTGGATGACGAAGCGCATCCACACGAACCCTGCCTACGCCGCCGCTGTCGGCATGATCGAGGTCCTCAACGAGCCCGTCTCCGGGCACGA  
CAAGGACCATCGGTATCCTGCCCTGGTGAAGTACCCGGACTGGTCCAAAAGTACTACCCGGCGCTCTCAAGGCAGTCCGAGATGCCGAAGCGTCGCTCGGCCGTGGCCGAAGGCAACAAGCTCCACGTGCA  
AATTATGTCCCAGAAGTGGGGCTCGGGCAACCCGCGGGACAACCTCTGCCGTGGCCAACGACAAGCTCAGTGCCTTCGATGACCACAACACTACATT

>Dactylis marina (haplotype 1)

ATGATGAGTGACGAGTGGAAACAACGTCATGGGTTGCAGTGGGGCTGCCTCCGAGTTCGACTGCATGCTCAACAATTACGGCGGAAGTAAACGAGACGCCGGCAACGAGAAGTTCGAGACTCACTGGAGGACT  
TGGATCAACGCCGACAGCGTCCAGTCAGCCACGACGTTGGCCTGAACACCATTTCGATTCCCATGGGGTACTGGTCCAACGTAGACATCGTCGACAAGGCCAGCGAGCCCTTCGCCGACGGCGACAGGATG  
CTCCCCCTACCTCGACGCCGTCGTCCAGAAGGCCGCTGACCTGGCATGTATGTCATCATCGATCTGCACGGGGCACCCGAAGGCCAGCAGGAGGACGCTTTCACCGGCCAGAACAACAAGCCAGCCGGCTT  
TTCAACAACACTACAACCTTCGGCCGTGCCAGGCATGGATGTCGTGGATGACGAAGCGCATCCACACGAACCCTGCCTACGCCGCCGCTGTCGGCATGATCGAAGTCTCAACGAGCCCGTCTCCGGGCACGAC  
AAGGACAATCGGTATCCTGCCCTGGTGAAGTACCCGGACTGGTCCAAAAGTACTACCCGGCGCTCTCAAGGCAGTCCGAGATGCCGAAGCGTCGCTCGGCCGTGGCCGATGGCAACAAGCTCCACGTGCA  
TTCATGTCCCAGAAGTGGGAATCGGGCAACCCGCGGGACAACCTCTGCCGTGGCCAACGACAAGCTCAGTGCCTTCGATGACCATAACTACATT

>Dactylis marina (haplotype 2)

ATGATGAGTGACGAGTGGAAACAACGTCATGGGTTGCAGCGGGGCTGCCTCCGAGTTCGACTGCATGCTCAACAATTACGGCGGAAGTAAACGAGACGCCGGCAACGAGAAGTTCGAGACTCACTGGAGGACT  
TGGATCAACGCCGACAGCGTCCAGTCAGCCACGACGTTGGCCTGAACACCATTTCGATTCCCATGGGGTACTGGTCCAACGTAGACATCGTCGACAAGGCCAGCGAGCCCTTCGCCGACGGCGACAGGATG  
CTCCCCCTACCTCGACGCCGTCGTCCAGAAGGCCGCTGACCTGGCATGTATGTCATCATCGATCTGCACGGGGCACCCGAAGGCCAGCAGGAGGACGCTTTCACCGGCCAGAACAACAAGCCAGCCGGCTT  
TTCAACGACTACAACCTTCGGCCGTGCCAGGCATGGATGTCGTGGATGACGAAGCGCATCCACACGAACCCTGCCTACGCCGCCGCTGTCGGCATGATCGAAGTCTCAACGAGCCAGTCTCCATGCACGACA  
AGGACAATCGGTATCCTGCCCTGGTGAAGTACCCGGACTGGTCCAAAAGTACTACCCGGCGCTCTCAAGGCAGTCCGAGATGCCGAAGCGTCGCTCGGCCGTGGCCGATGGCAACAAGCTCCACGTGCA  
TTCATGTCCCAGAAGTGGGAATCGGGCAACCCGCGGGACAACCTCTGCCGTGGCCAACGACAAGCTCAGTGCCTTCGATGACCATAACTACATT

>Dactylis marina (haplotype 3)

ATGATGAGTGACGAGTGGAAACAACGTCATGGGTTGCAGCGGGGCTGCCTCCGAGTTCGACTGCATGCTCAACAATTACGGCGGAAGTAAACGAGACGCCGGCAACGAGAAGTTCGAGACTCACTGGAGGACT  
TGGATCAACGCCGACAGCGTCCAGTCAGCCACGACGTTGGCCTGAACACCATTTCGATTCCCATGGGGTACTGGTCCAACGTAGACATCGTCGACAAGGCCAGCGAGCCCTTCGCCGACGGCGACAGGATG  
CTCCCCCTACCTCGACGCCGTCGTCCAGAAGGCCGCTGACCTGGCATGTATGTCATCATCGATCTGCACGGGGCACCCGGAGGCCAGCAGGAGGACGCTTTCACCGGCCAGAACAACAAGCCAGCCGGCTT  
CTTCAACGACTACAACCTTCGGCCGTGCCAGGCATGGATGTCGTGGATGACGAAGCGCATCCACACGAACCCTGCCTACGCCGCCGCTGTCGGCATGATCGAAGTCTCAACGAGCCAGTCTCCAGGCACGA  
CAAGGACAATCGGTATCCTGCCCTGGTGAAGTACCCGGACTGGTCCAAAAGTACTACCCGGCGCTCTCAAGGCAGTCCGAGATGCCGAAGCGTCACTCGGCCGTGGCCGATGGCAACAAGCTCCACGTGCA  
ATTCATGTCCGTGGGAGTGGGGCAACCCGCGGGACAACCTCTGCCGTGGCCAACGACAAGCTCAGTGCCTTCGATGACCATAACTACATT



# Supplementary Fig. S5

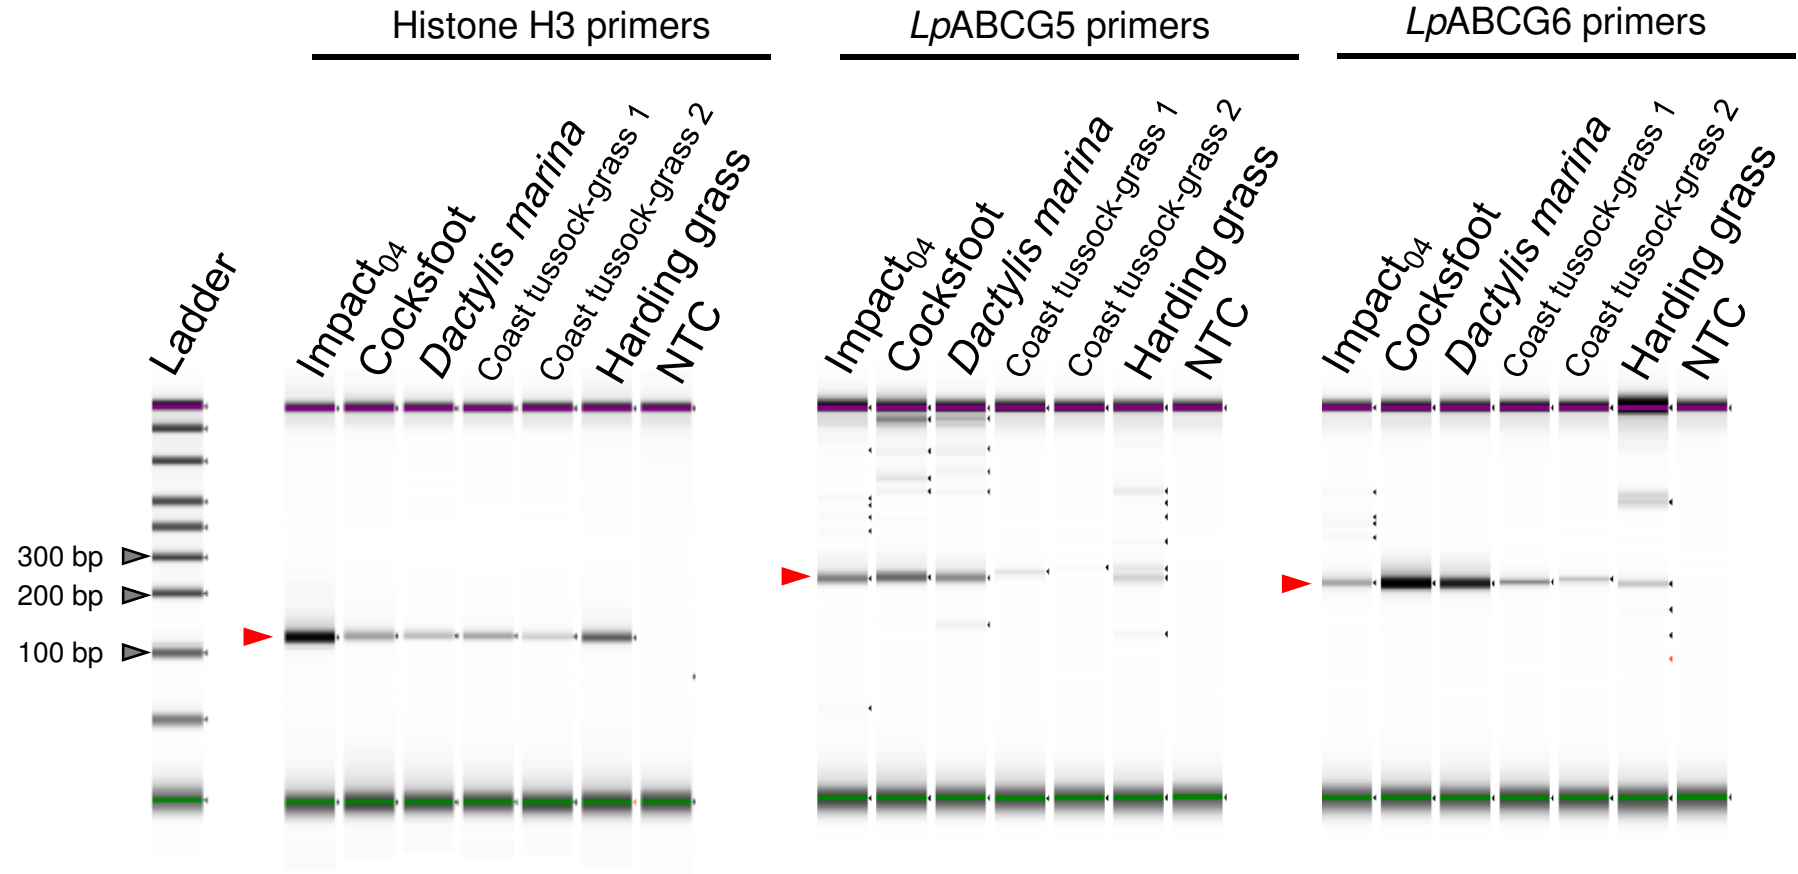

## Supplementary Table S1

| Species                      | Sequence identity (length of homologous sequence) |                    |                     |                 |                     |
|------------------------------|---------------------------------------------------|--------------------|---------------------|-----------------|---------------------|
|                              | NCBI UI                                           | <i>E. festucae</i> | <i>Neotyphodium</i> | <i>H. lixii</i> | <i>T. harzianum</i> |
| Perennial ryegrass           | KY771173 ( <i>Lp</i> BGNL)                        | 90% (1140 bp)      | 89% (1140 bp)       | 75% (1101 bp)   | 74% (1103 bp)       |
| <i>Epichloe festucae</i>     | EF015481.1                                        | -                  | 98% (1164 bp)       | 74% (1101 bp)   | 73% (1112 bp)       |
| <i>Neotyphodium sp.</i>      | AF535131.1                                        | -                  | -                   | 74% (1283 bp)   | 73% (1288 bp)       |
| <i>Hypocrea lixii</i>        | EU747838                                          | -                  | -                   | -               | 96% (1320 bp)       |
| <i>Trichoderma harzianum</i> | X79197.1                                          | -                  | -                   | -               | -                   |

## Supplementary Table S2

| Library       | Total reads | Counts | CPM  |
|---------------|-------------|--------|------|
| Root tip      | 14,656,730  | 479    | 32.7 |
| Root (middle) | 14,515,287  | 798    | 55.0 |
| Leaf middle 1 | 23,613,687  | 87     | 3.7  |
| Leaf middle 2 | 19,292,712  | 49     | 2.5  |
| Leaf middle 3 | 14,752,797  | 54     | 3.7  |
| Leaf tip 1    | 22,525,848  | 272    | 12.1 |
| Leaf tip 2    | 19,271,284  | 113    | 5.9  |
| Leaf tip 3    | 16,738,932  | 154    | 9.2  |
| Flower        | 11,536,030  | 767    | 66.5 |

## Supplementary Table S3

|         | E <sup>-</sup> individual |                |       |                                             |      | E <sup>+</sup> individual |                |       |                                             |      |
|---------|---------------------------|----------------|-------|---------------------------------------------|------|---------------------------|----------------|-------|---------------------------------------------|------|
|         | Total reads               | <i>Lp</i> BGNL |       | <i>Epichloë</i> $\beta$ -1,6-glucanase gene |      | Total reads               | <i>Lp</i> BGNL |       | <i>Epichloë</i> $\beta$ -1,6-glucanase gene |      |
|         |                           | Counts         | CPM   | Counts                                      | CPM  |                           | Counts         | CPM   | Counts                                      | CPM  |
| 0 h     | 54,109,844                | 19             | 0.35  | 0                                           | 0.00 | 36,389,285                | 4              | 0.11  | 5                                           | 0.14 |
| 4 h     | 62,109,304                | 30             | 0.48  | 1                                           | 0.02 | 42,014,889                | 109            | 2.59  | 7                                           | 0.17 |
| 1 day   | 74,819,980                | 2751           | 36.77 | 3                                           | 0.04 | 64,295,493                | 802            | 12.47 | 28                                          | 0.44 |
| 2 days  | 71,779,944                | 6285           | 87.56 | 1                                           | 0.01 | 57,472,563                | 2838           | 49.38 | 25                                          | 0.43 |
| 5 days  | 59,159,973                | 3391           | 57.32 | 1                                           | 0.02 | 57,259,134                | 1847           | 32.26 | 9                                           | 0.16 |
| 10 days | 102,085,102               | 6565           | 64.31 | 0                                           | 0.00 | 53,748,829                | 3901           | 72.58 | 22                                          | 0.41 |

## Supplementary Table S4

| Species                                     | UI        | Instrument          | Data size                        | Submitted by                    |
|---------------------------------------------|-----------|---------------------|----------------------------------|---------------------------------|
| <i>Dactylis glomerata</i> L. (orchardgrass) | SRX738187 | Illumina HiSeq 2000 | 1 run, 162.8M spots, 32.6G bases | Sichuan Agricultural University |
| <i>Deschampsia antarctica</i>               | SRX465632 | Illumina HiSeq 2000 | 1 run, 153.3M spots, 31G bases   | KOREA POLAR RESEARCH INSTITUTE  |
| <i>Poa annua</i>                            | SRX745831 | Illumina HiSeq 2000 | 1 run, 129.3M spots, 25.9G bases | Auburn University               |
| <i>Poa supina</i>                           | SRX745855 | Illumina HiSeq 2000 | 1 run, 44.4M spots, 8.9G bases   | Auburn University               |
| <i>Poa infirma</i>                          | SRX745858 | Illumina HiSeq 2000 | 1 run, 46.3M spots, 9.3G bases   | Auburn University               |
| <i>Phalaris aquatica</i>                    | SRX669405 | Illumina HiSeq 2000 | 1 run, 50.4M spots, 10.2G bases  | Teagasc                         |

## Supplementary Table S5

| Primer name  | Sequence (5'->3')    |                        | Amplicon size* | DNA template                                                                                                                                                                                                                          |
|--------------|----------------------|------------------------|----------------|---------------------------------------------------------------------------------------------------------------------------------------------------------------------------------------------------------------------------------------|
|              | Forward              | Reverse                |                |                                                                                                                                                                                                                                       |
| LpBGNL_short | GTCGGCATGATTGAGGTTCT | ACTGCACATGGAGCTTGTTG   | 178 bp         | perennial ryegrass, darnel, meadow fescue, tall fescue, sheep fescue, cocksfoot, <i>Dactylis marina</i> , coast tussock-grass, <i>Phalaris aquatica</i> , perennial ryegrass-associated endophyte, perennial ryegrass genomic library |
| LpBGNL_inde1 | AGGGCATCAACAAGATCAGG | CGTCGCTCATCATCCATGGC   | 253/306 bp     | p150/112 genetic mapping population                                                                                                                                                                                                   |
| LpBGNL_long1 | CGCGCCTAATCCTCTCCTCT | CAGATATCTTGATACACATTCC | 1452 bp        | perennial ryegrass, tall fescue, meadow fescue                                                                                                                                                                                        |
| LpBGNL_long2 | GCCCGTCTGACGGGGCACAG | CAGATATCTTGATACACATTCC | 1590 bp        | darnel                                                                                                                                                                                                                                |
| LpBGNL_long3 | CATCAACAAGATCAGGGGCG | CTGCCCGTTCACGGTGCGAT   | 1067 bp        | sheep fescue                                                                                                                                                                                                                          |
| LpBGNL_long4 | CACGACTTGGCTGCTTTCAA | TTTGTCGTCCGGGCTCACGC   | 1147 bp        | cocksfoot, <i>Dactylis marina</i>                                                                                                                                                                                                     |
| LpBGNL_cons  | CTGCCTCCGAGTTCGACTG  | TGGATGCGCYTCGTCATCC    | 415 bp         | perennial ryegrass, cocksfoot, <i>Dactylis marina</i> , coast tussock-grass, <i>Phalaris aquatica</i> , perennial ryegrass-associated endophyte                                                                                       |
| LpHistone**  | TGCTTGCCCTTCAGGAGGCT | ATCCTCCTGGCAAGCTGAATG  | 126 bp**       | perennial ryegrass, cocksfoot, <i>Dactylis marina</i> , coast tussock-grass, <i>Phalaris aquatica</i>                                                                                                                                 |
| LpABCG5      | ATCAGGAAGGAGAGCCTCCA | ATGATGGTGTGGCCGCGTT    | 248 bp         | perennial ryegrass, cocksfoot, <i>Dactylis marina</i> , coast tussock-grass, <i>Phalaris aquatica</i>                                                                                                                                 |
| LpABCG6      | TAACGCTCAACGGGGACG   | TCGTCGCCGATGATGGTGTT   | 235 bp         | perennial ryegrass, cocksfoot, <i>Dactylis marina</i> , coast tussock-grass, <i>Phalaris aquatica</i>                                                                                                                                 |

\* Length of DNA fragment based on the perennial ryegrass genome sequence

\*\* Reference: Tu, Y. *et al.* 2010 Functional Analyses of Caffeic Acid O-Methyltransferase and Cinnamoyl-CoA-Reductase Genes from Perennial Ryegrass (*Lolium perenne*). *The Plant Cell* **22**, 3357–3373. (doi:10.1105/tpc.109.072827)

## Supplementary Note S1

Figure. Molecular Phylogenetic analysis by Maximum Likelihood method

The evolutionary history was inferred by using the Maximum Likelihood method based on the JTT matrix-based model [1]. The tree with the highest log likelihood (-3092.1463) is shown. The percentage of trees in which the associated taxa clustered together is shown next to the branches. Initial tree(s) for the heuristic search were obtained automatically by applying Neighbor-Join and BioNJ algorithms to a matrix of pairwise distances estimated using a JTT model, and then selecting the topology with superior log likelihood value. The tree is drawn to scale, with branch lengths measured in the number of substitutions per site. The analysis involved 24 amino acid sequences. All positions containing gaps and missing data were eliminated. There were a total of 249 positions in the final dataset. Evolutionary analyses were conducted in MEGA7 [2].

1. Jones D.T., Taylor W.R., and Thornton J.M. (1992). The rapid generation of mutation data matrices from protein sequences. *Computer Applications in the Biosciences* 8: 275-282.
2. Kumar S., Stecher G., and Tamura K. (2016). MEGA7: Molecular Evolutionary Genetics Analysis version 7.0 for bigger datasets. *Molecular Biology and Evolution* 33:1870-1874.
